# Supplementary material
Source: publisher site journal article supplement (https://www.spandidos-publications.com/2019/downloadSupplementary)

Figure S1. Expression profiles of H3K4ac, H3K27ac and H4K12ac in the plasma of patients with Alzheimer's disease (n=30) and healthy subjects (n=30).

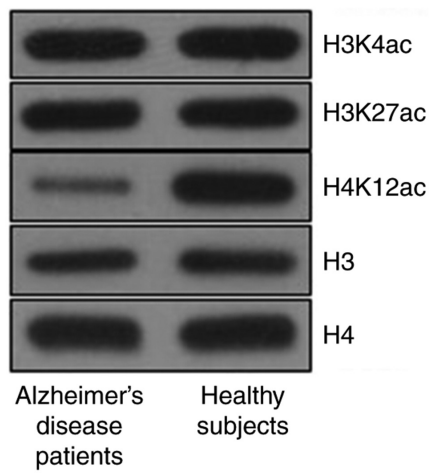

Figure S2. Expression profiles of H3K4ac, H3K27ac and H4K12ac in KAT8-overexpression 293/APPsw cells. KAT8, lysine acetyltransferase 8; NC, negative control.

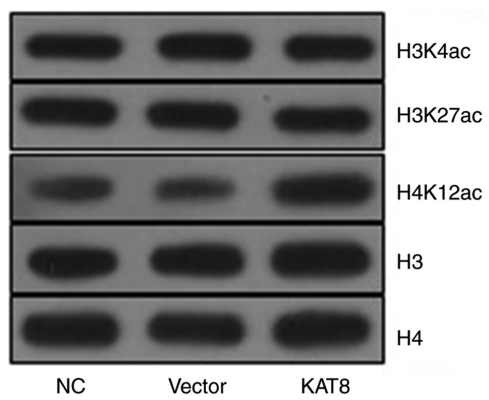

Supplement: Supplementary file 1 [file downloadSupplementary]
